# Supplementary material for: Carbon doping of ceria-supported palladium for the low-temperature oxidation of methane
Source: Royal Society of Chemistry journal article supplement (doi:10.1039/d3cy00694h), 2023-01-01
Supplement: d3cy00694h1.pdf [file d3cy00694h1.pdf]

## Supplementary Information

### Carbon doping of Ceria-supported Palladium for low-temperature oxidation of methane

Takashi Hihara,<sup>\*a,b</sup> Yasuyuki Banno<sup>a</sup>, Makoto Nagata<sup>a</sup>, Takeshi Fujita<sup>c</sup> and Hideki Abe<sup>\*b,d</sup>

<sup>a</sup> N.E. Chemcat corporation, 678 Ipponmatsu Numazu, Shizuoka 410-0312, Japan.

<sup>b</sup> Graduate school of Science and Technology, Saitama University, Shimo-Okubo 255, Sakura-ku, Saitama-shi, 338-8570, Japan

<sup>c</sup> Kohchi University of Technology, Kami Campus, 185 Miyanokuchi, Tosayamada, Kami City, Kochi 782-8502, Japan

<sup>d</sup> National Institution of Material & Substances, Namiki-site, 1-1 Namiki, Tsukuba, Ibaraki, 305-0044, Japan.

\* takashi.hihara@ne-chemcat.co.jp

\* ABE.Hideki@nims.go.jp

Table S1. CO adsorption result of AS-Pd/CeO<sub>2</sub>.

| CO adsorption amount | Pd particle size |
|----------------------|------------------|
| [cm <sup>3</sup> /g] | [nm]             |
| 5.29                 | 1.3              |

CO adsorption measurement was conducted in a CO pulse chemisorption method with Catalyst Analyzer BELCAT II made by Microtrac BEL Corp.

An aliquot of 0.3347 g of AS-Pd/CeO<sub>2</sub> was placed in the sample holder. It was heated from room temperature to 400 °C under 100 % He gas stream at 150 mL/min. After 15 min at 400 °C, the gas stream was changed to 100 % H<sub>2</sub> at 150 mL/min, then pre-treated for 10 min. Then 100 % H<sub>2</sub> was changed to 100 % He at 400 °C, kept 10 min, then cooled to 50 °C.

After the pretreatment, 0.935 cm<sup>3</sup>/pulse, as STD, of CO was fed 12 times and CO in the outlet gas was detected by TCD. The amount of chemisorption was calculated by subtracting the small area of the 1<sup>st</sup> to 9<sup>th</sup> pulses from the area of the inlet pulse. The Pd particle size was calculated from the amount of CO chemisorption by the calculation equation reported in the literature [1-2].

- 1 ) C. N. Costa, S. Y. Christou, G. Georgiou, A. M. Efstathiou, J. Catal., 219 (2003) 259.
- 2 ) J.J.F. Scholten, A.P. Pijpers, A.M.L. Hustings, Catal. Rev.-Sci. Eng., 27 (1) (1985), p. 151.

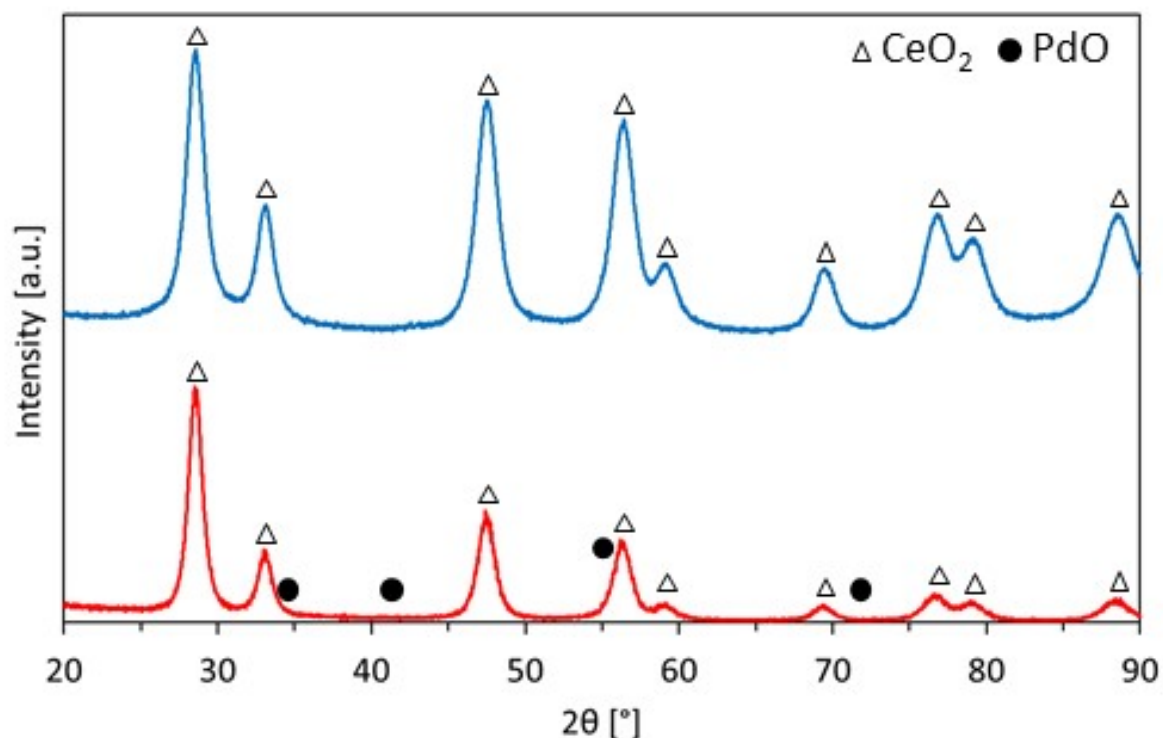

Figure S1. XRD pattern of  $\text{CeO}_2$  and AS-Pd/ $\text{CeO}_2$ .

$\text{CeO}_2$  and AS-Pd/ $\text{CeO}_2$  were characterized by XRD with D8 ADVANCE made by BRUKER and diffraction patterns were shown in Figure S1.

Diffraction peaks originating from Cerium (IV) Oxide were confirmed in both  $\text{CeO}_2$  and AS-Pd/ $\text{CeO}_2$  but there was no peak relating to Pd, for example, PdO in AS-Pd/ $\text{CeO}_2$ . We speculated the reason Pd was highly dispersed on  $\text{CeO}_2$  and could not be likely to form Pd and/or PdO crystal but amorphous. This speculation is consistent with the characterization results of CO chemisorption shown in Table S1 and STEM-EDS shown in Figure S2.

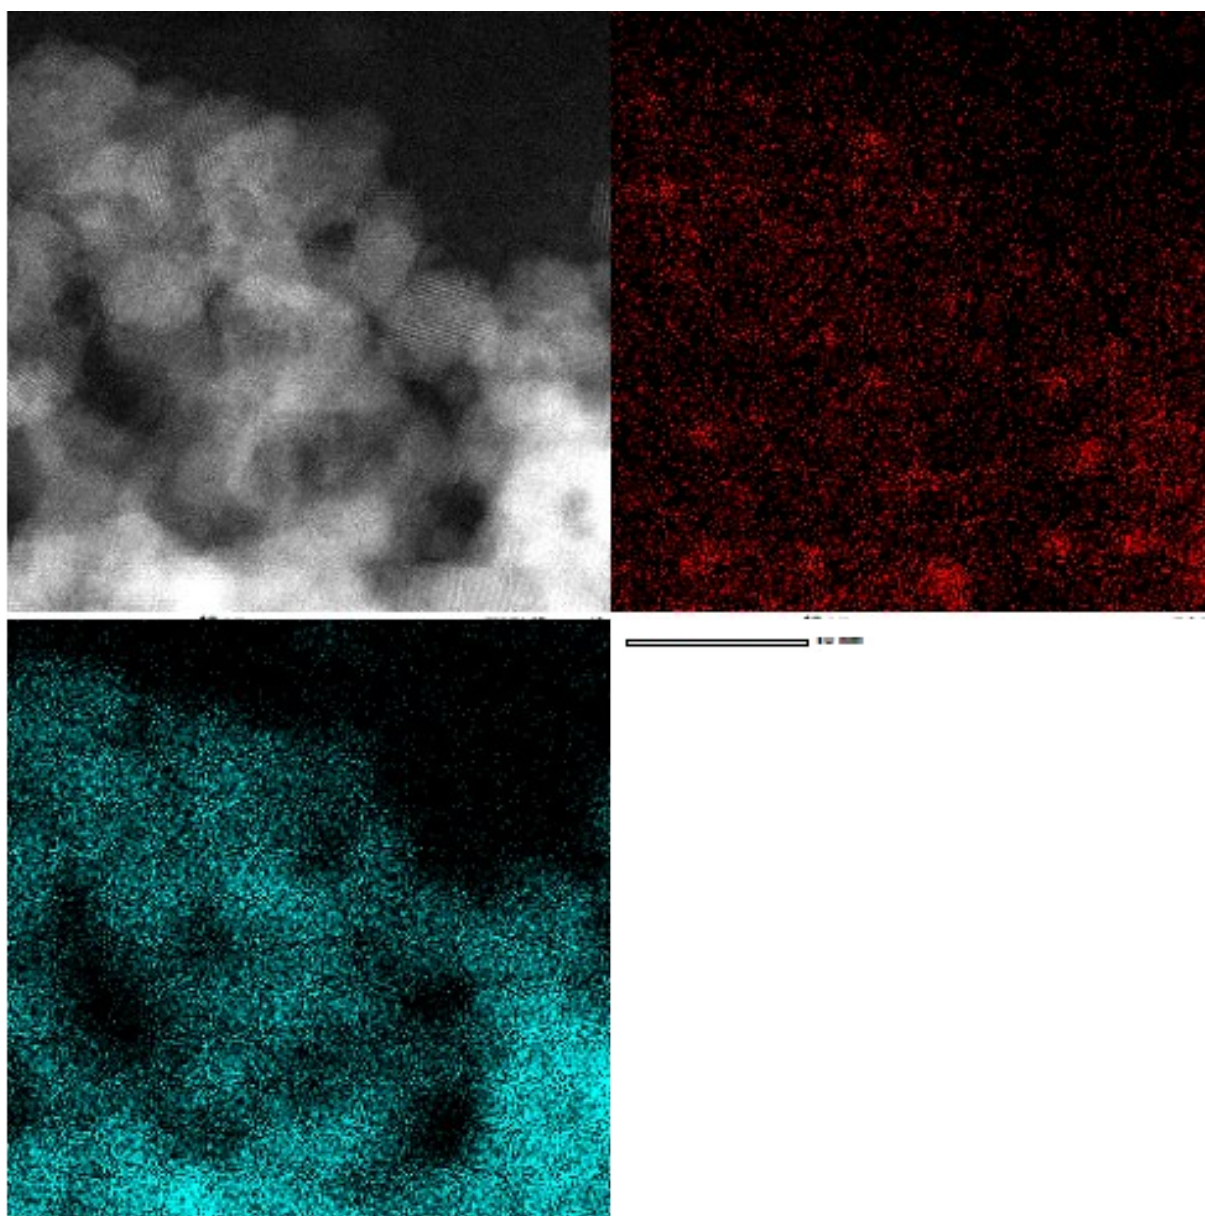

Figure S2. STEM image of AS-Pd/CeO<sub>2</sub>.  
(a) STEM image, (b) EDS mapping of Palladium, (c) EDS mapping of Cerium.



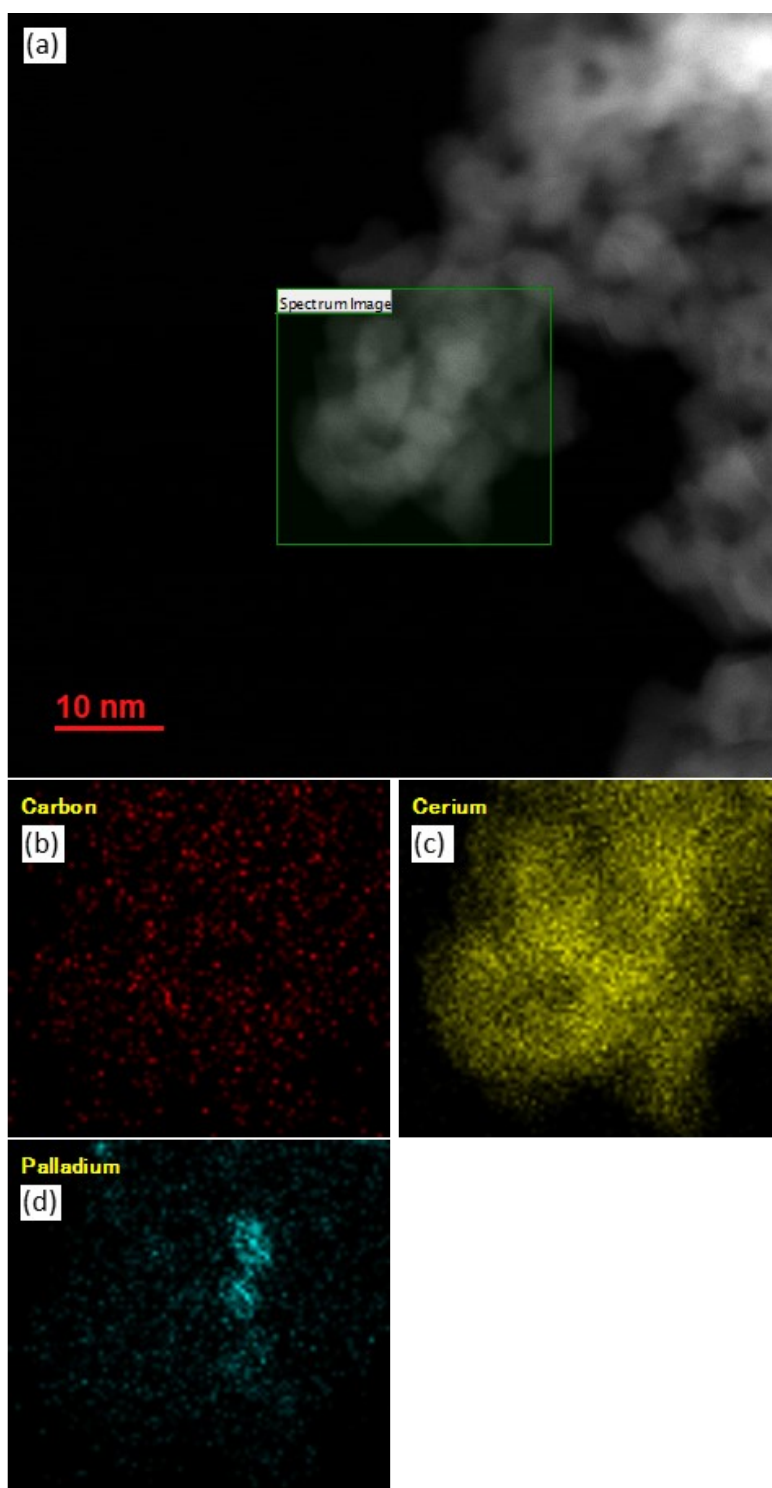

Figure S4. STEM-EDS of ST-Pd/CeO<sub>2</sub>.  
(a) STEM image, EDS mapping of (b) Carbon, (c) Cerium, and  
(d) Palladium.

No Carbon above background levels was detected.

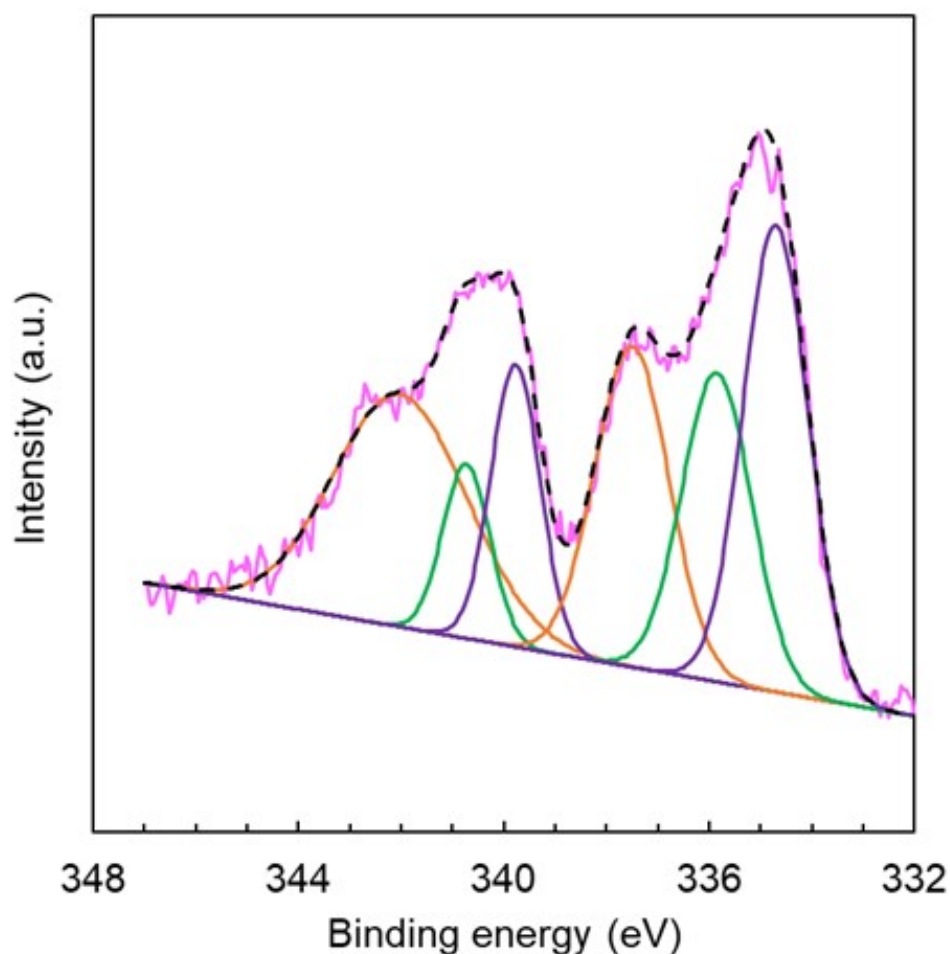

Figure S5. Pd 3d XPS spectra of ST-Pd/CeO<sub>2</sub>.

The pink curve is XPS measurement results. Each of the Pd 3d<sub>5/2</sub> and Pd 3d<sub>3/2</sub> emission peaks were deconvoluted into multiple peaks. The deconvoluted Pd 3d<sub>5/2</sub> peaks for ST-Pd/CeO<sub>2</sub> at 337.5 eV, 335.9 eV, and 334.7 eV were assigned to PdO<sub>y</sub>, Palladium carbides (PdC<sub>x</sub>), and Pd metal, respectively, similar to LT-Pd/CeO<sub>2</sub> as shown in Fig. 2. Violet: the deconvoluted peak of Pd metal, Green: the deconvoluted peak of PdC<sub>x</sub>, Orange: the deconvoluted PdO<sub>y</sub>. The broken curve is the sum of deconvoluted peaks of Pd metal, PdC<sub>x</sub>, and PdO<sub>y</sub>.

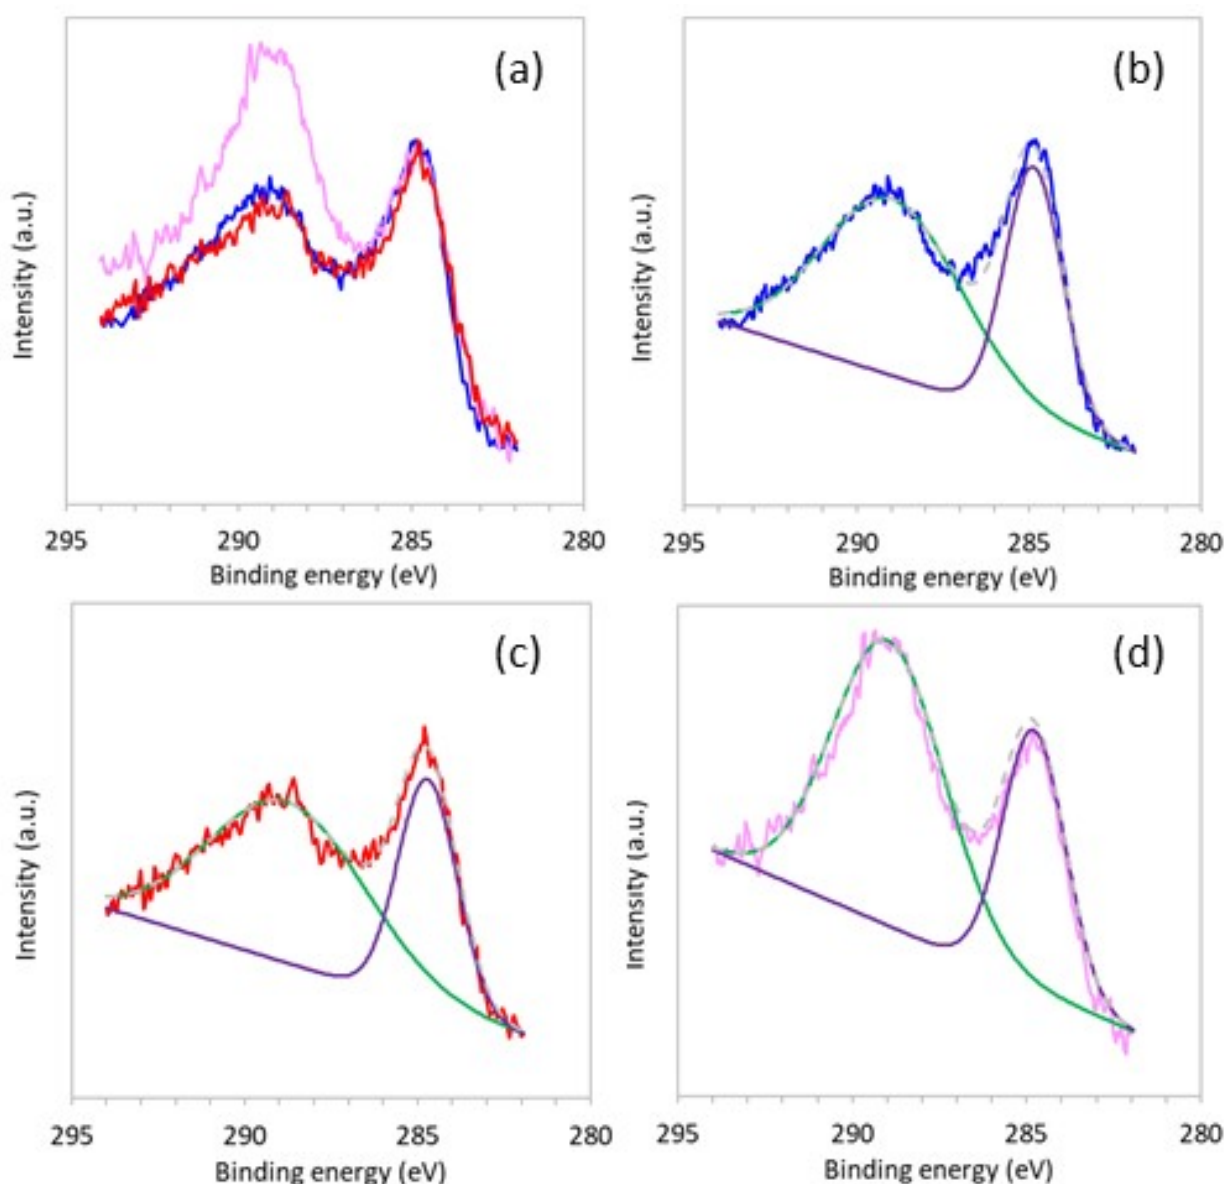

Figure S6. Carbon 1s XPS spectra of AS-, LT- and ST-Pd/ CeO<sub>2</sub> (a), Curve-fitted spectra of AS-Pd/CeO<sub>2</sub> (b), LT-Pd/CeO<sub>2</sub> (c), and ST-Pd/CeO<sub>2</sub> (d).

Blue: AS-Pd/CeO<sub>2</sub>, Red: LT-Pd/CeO<sub>2</sub>, Pink: ST-Pd/CeO<sub>2</sub>. Green and Violet lines were deconvoluted spectra and the gray dash line was the sum of deconvoluted lines.

Table S2. Deconvoluted peak area analysis for Carbon 1s.

| Sample                 | Assigned as O-C=O   |      | Assigned as C=C, C-C |      | Area ratio<br>"O-C=O" / "C=C, C-C" |
|------------------------|---------------------|------|----------------------|------|------------------------------------|
|                        | Binding energy (eV) | Area | Binding energy (eV)  | Area |                                    |
| AS-Pd/CeO <sub>2</sub> | 289.0               | 58.5 | 284.9                | 35.0 | 1.67                               |
| LT-Pd/CeO <sub>2</sub> | 288.8               | 58.6 | 284.7                | 31.4 | 1.87                               |
| ST-Pd/CeO <sub>2</sub> | 289.0               | 75.0 | 284.8                | 38.2 | 1.96                               |

High-resolution XPS C 1s spectra are shown in Figure S5-(a). Each spectrum had two peaks, one was at around 289 eV and the other was at around 285 eV. Concerning the previous literature relating to Graphene oxides (GO) and Carboxylated-Graphene studied by Alex *et al.* [*ACS Nano* 2017, 11, 1789-1797], the former peak was assigned as carboxylic carbons (labeled O-C=O), and the latter peak was assigned as *sp*<sup>2</sup> carbon C=C and/or *sp* carbon C-C (labeled C=C, C-C). Deconvoluted peaks in each spectrum were shown in SI figure 5-(b) AS-Pd/CeO<sub>2</sub>, (c) LT-Pd/CeO<sub>2</sub>, and (d) ST-Pd/CeO<sub>2</sub>, respectively. Deconvoluted peak areas were summarized in SI Table 2. The peak area ratio of "O-C=O"/"C=C, C-C" increased from 1.67 in AS-Pd/CeO<sub>2</sub> to 1.87 in LT-Pd/CeO<sub>2</sub> and 1.96 in ST-Pd/CeO<sub>2</sub>. When the increase of O-C=O was considered in combination with the increase of PdC<sub>x</sub>, Pd nanoparticles would interact with Carbon in O-C=O. From these considerations, we interpreted that oxo-carbon species might also present on and/or next to Pd nanoparticles and it might be increased by the Carbon doping.

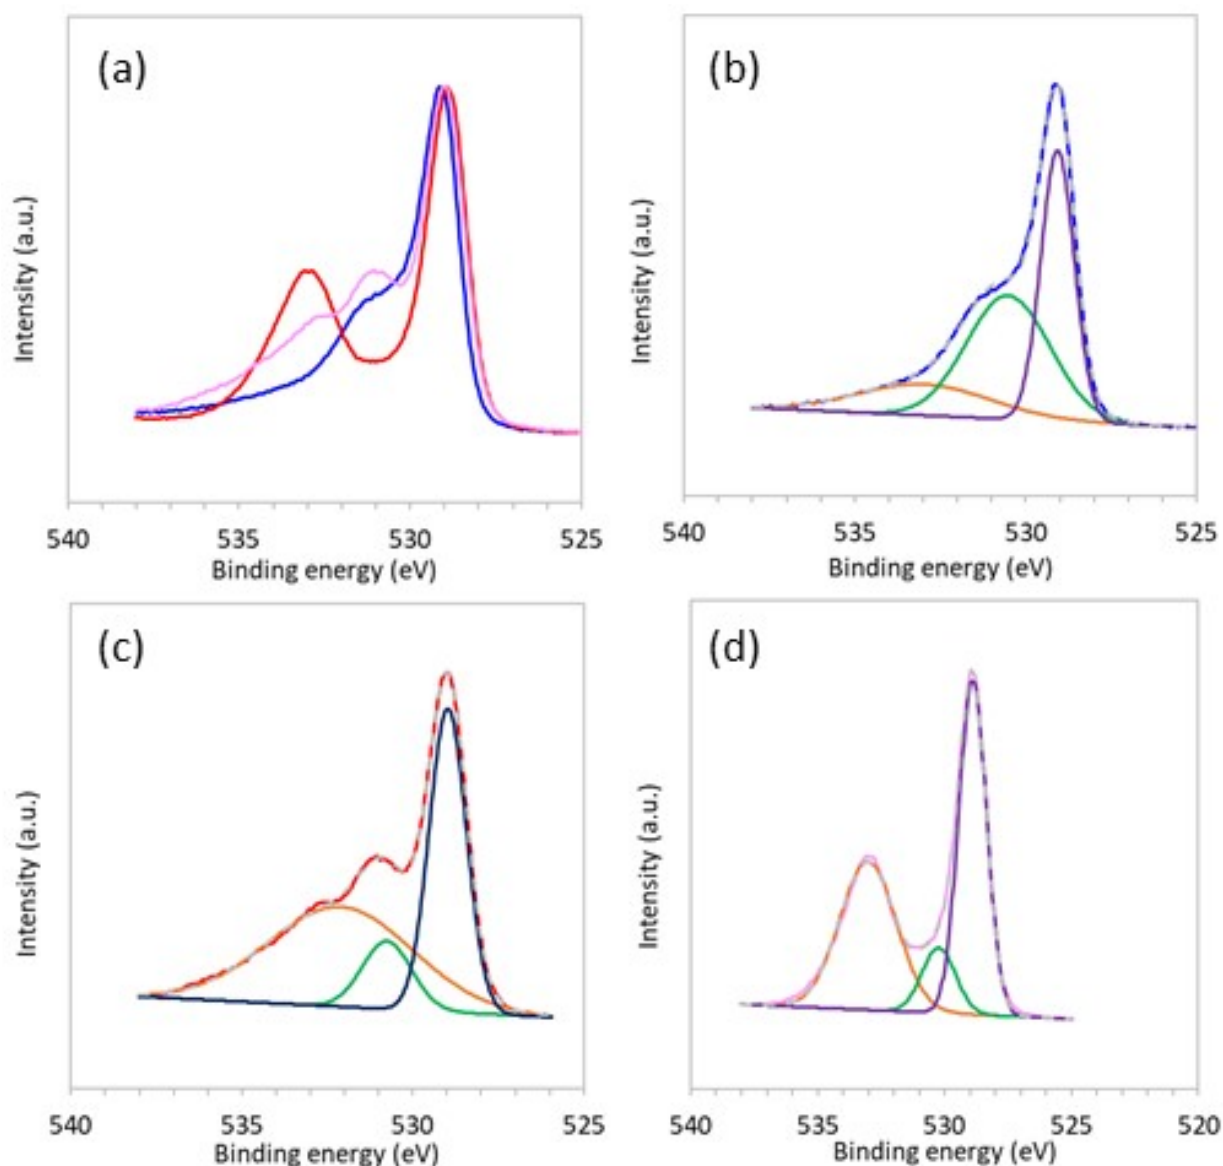

Figure S7. Oxygen 1s XPS spectra of AS-, LT- and ST-Pd/CeO<sub>2</sub> (a), Curve-fitted spectra of AS-Pd/CeO<sub>2</sub> (b), LT-Pd/CeO<sub>2</sub> (c), and ST-Pd/CeO<sub>2</sub> (d).

Blue: AS-Pd/CeO<sub>2</sub>, Red: LT-Pd/CeO<sub>2</sub>, Pink: ST-Pd/CeO<sub>2</sub>. Orange, green and Violet lines were deconvoluted spectra and the gray dash line was the sum of deconvoluted lines.

Table S3. Deconvoluted peak area analysis for Oxygen 1s.

| Sample                 | Assigned as -COOH   |      | Assigned as PdO     |      | Assigned as CeO <sub>2</sub> |      | Area ratio<br>"-COOH" / "CeO <sub>2</sub> " | Area ratio<br>"PdO" / "CeO <sub>2</sub> " |
|------------------------|---------------------|------|---------------------|------|------------------------------|------|---------------------------------------------|-------------------------------------------|
|                        | Binding energy (eV) | Area | Binding energy (eV) | Area | Binding energy (eV)          | Area |                                             |                                           |
| AS-Pd/CeO <sub>2</sub> | 533.0               | 8.7  | 530.5               | 22.0 | 529.1                        | 19.3 | 0.45                                        | 1.13                                      |
| LT-Pd/CeO <sub>2</sub> | 532.1               | 30.4 | 530.8               | 7.1  | 529.0                        | 23.9 | 1.27                                        | 0.30                                      |
| ST-Pd/CeO <sub>2</sub> | 533.0               | 23.7 | 530.2               | 6.2  | 528.9                        | 26.4 | 0.90                                        | 0.24                                      |

High-resolution XPS O 1s spectra were shown in Figure S6-(a), and each spectrum had three peaks at around 532.8 eV, 530.5 eV, and 529 eV.

The peak at around 532.8 eV was assigned as Oxygen in the carboxyl group interacted with Palladium referred to the previous literature studied by Aas N., Bowker M. et. Al. [*J. Chem. Soc. Faraday Trans.* 89, 1249 (1993)]. The peak at around 530.5 eV was assigned as Oxygen in PdO referring to the previous literature studied by Militello M.C. et. Al. [*Surf. Sci. Spectra* 3, 395 (1994)]. The peak at around 529 eV was assigned as Oxygen in CeO<sub>2</sub> referring to the previous literature studied by Paparazzo E. et al. [*Surf. Sci.* 234, L253 (1990)].

Deconvoluted peaks in each spectrum were shown in SI figure 6-(b) AS-Pd/CeO<sub>2</sub>, (c) LT-Pd/CeO<sub>2</sub>, and (d) ST-Pd/CeO<sub>2</sub>, respectively. Deconvoluted peak areas were summarized in Table S3. The peak area ratio of "PdO" / "CeO<sub>2</sub>" decreased from 1.13 in AS-Pd/CeO<sub>2</sub> to 0.30 in LT-Pd/CeO<sub>2</sub> and 0.24 in ST-Pd/CeO<sub>2</sub>. It was reasonable because of atmosphere treatment under CH<sub>4</sub>-rich gas conditions. The peak area ratio of "-COOH" / "CeO<sub>2</sub>" increased from 0.45 in AS-Pd/CeO<sub>2</sub> to 1.27 in LT-Pd/CeO<sub>2</sub> and 0.90 in ST-Pd/CeO<sub>2</sub>. The increase of "-COOH" was consistent with the increase of "O-C=O" in Carbon 1s.

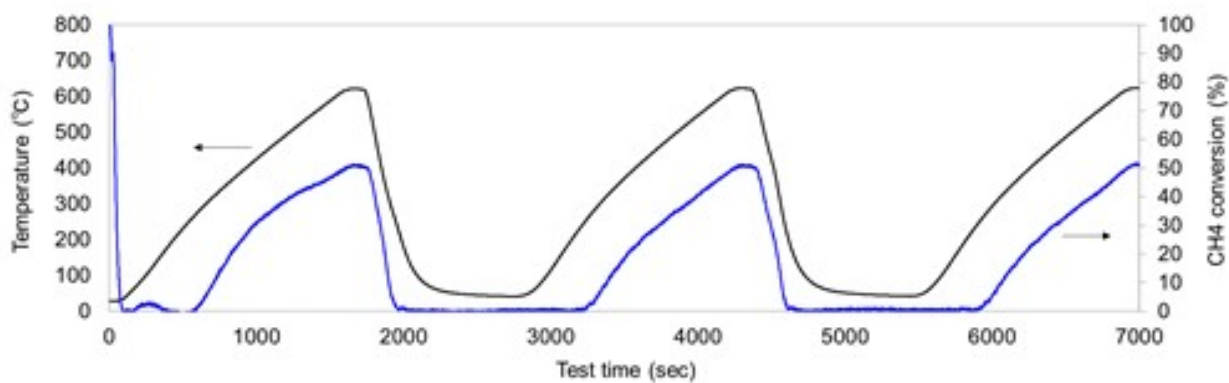

Figure S8. Example of the consecutive CH<sub>4</sub> L/O test under the simulated lean-burn exhaust, in the case of AS-Pd/CeO<sub>2</sub>.

AS-Pd/CeO<sub>2</sub> and LT-Pd/CeO<sub>2</sub> were evaluated under lean inlet gas conditions in the consecutive CH<sub>4</sub> L/O test. Test results of 1st and 2nd L/O were shown in Fig. 4c.

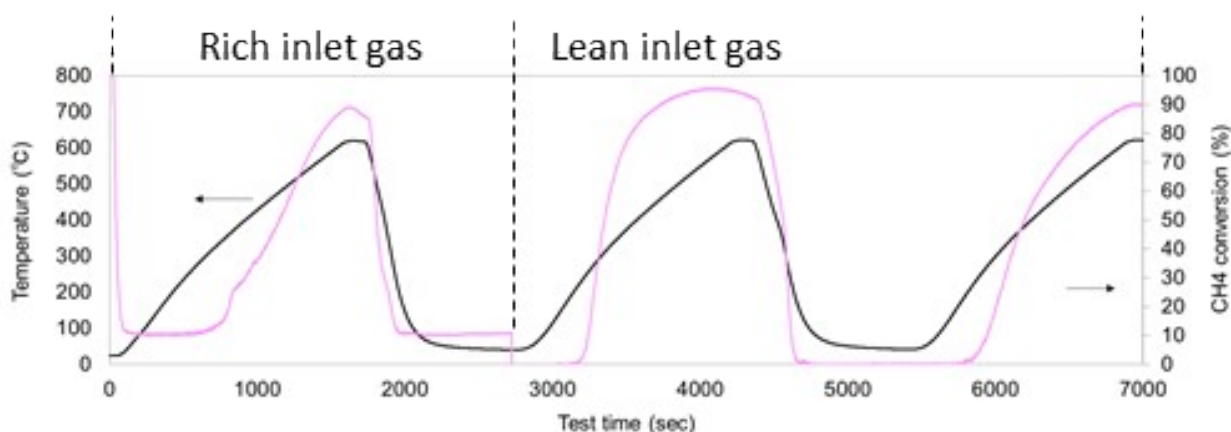

Figure S9. Consecutive CH<sub>4</sub> L/O test of ST-Pd/CeO<sub>2</sub> which consist of 1<sup>st</sup> L/O under rich gas condition and 2<sup>nd</sup> & 3<sup>rd</sup> L/O under lean gas condition.

In the case of ST-Pd/CeO<sub>2</sub>, an aliquot of 50 mg of AS-Pd/CeO<sub>2</sub> was exposed in a stream of a mixture gas consisting of 0.5 % and 0.2 % of CH<sub>4</sub> and O<sub>2</sub> during 1st-L/O. And 2nd and 3rd L/O test was conducted after the inlet gas was changed to lean inlet gas composition.

Test results of 1st and 2nd L/O under lean gas, *i.e.* a mixture gas containing 0.1 % and 8 % of CH<sub>4</sub> and O<sub>2</sub>, shown in Fig. 4c was corresponding to the 2nd and 3rd L/O test results in this Figure S9, respectively.

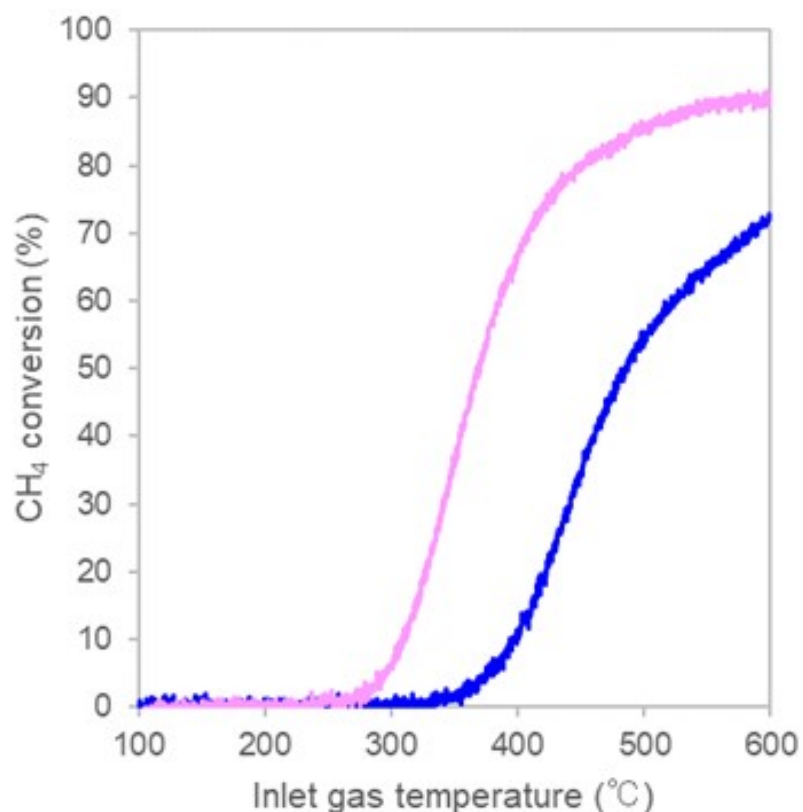

Figure S10. CH<sub>4</sub> L/O test under inlet gas including 2% H<sub>2</sub>O.  
 . Blue: AS-Pd/CeO<sub>2</sub>, Pink: ST-Pd/CeO<sub>2</sub>.

Co-existing H<sub>2</sub>O in the inlet gas disturbed catalytic oxidation of CH<sub>4</sub> compared to the dry condition which was adopted in the evaluation tests shown in Fig. 4, Figure S7 and Figure S8. But the atmosphere treatment under CH<sub>4</sub>-rich gas condition was effective to lower CH<sub>4</sub> L/O temperature even in the wet condition as shown in this Figure S10.

The catalyst performance test including H<sub>2</sub>O in the inlet mixed gas was conducted with a mass flow-controllable system (BELCAT-A, MicrotracBEL Corp.). An aliquot of 50 mg of catalyst powder was placed in a glass sample tube, sandwiched between glass wool. The mixed gas was fed containing 0.1 %, 2 % and 8 % of CH<sub>4</sub>, H<sub>2</sub>O and O<sub>2</sub>, respectively. He gas was bubbled into the thermostatic water bath at 50 °C, and 2% of H<sub>2</sub>O was achieved by the control of the mass flow of the He. The total gas stream was balanced with pure He with another gas line to adjust the flow to 300 mL/min. The sample temperature was raised from room temperature up to 600 °C at a ramping rate of 20 °C/min and lowered down to 40 °C. The outlet gas from the sample tube during the test was introduced to the FTIR (DATABIRD FAST-1200NE, IWATA DENGYO CO., LTD) to quantify the gas composition.

Table S4. CH<sub>4</sub>-T50 results without and with pretreatment from published literatures

| Source                                     | Sample conditions |                                                                    | CH4-T50 | Evaluation conditions |        |          |      |               |           |
|--------------------------------------------|-------------------|--------------------------------------------------------------------|---------|-----------------------|--------|----------|------|---------------|-----------|
|                                            | Catalyst          | Pre-treatment                                                      |         | O2 (%)                | H2O(%) | WHSV     | GHSV | Sample weight | Flow rate |
|                                            |                   |                                                                    |         | %                     | %      | L/(hr*g) | h-1  | mg/test       | mL/min    |
| Our result                                 | 3%Pd/CeO2         | -                                                                  | 615     |                       |        |          |      |               |           |
|                                            |                   | Short-term atmosphere treatment from 40 to 600C & from 600C to 40C | 308     |                       | 0      |          |      |               |           |
|                                            |                   | Long-term atmosphere treatment at 230C for 100hr                   | 310     | 8                     |        | 360      | -    | 50            | 300       |
|                                            |                   | -                                                                  | 481     |                       | 2      |          |      |               |           |
|                                            |                   | Short-term atmosphere treatment from 40 to 600C                    | 367     |                       |        |          |      |               |           |
|                                            |                   |                                                                    |         |                       |        |          |      |               |           |
| ACS Catal. 2021, 11, 4870-4879             | 2%Pd/Al2O3        | -                                                                  | 342     |                       | 0      |          |      |               |           |
|                                            |                   |                                                                    | 428/430 | 4                     |        | 120      | -    | -             | -         |
|                                            |                   | -                                                                  |         |                       | 10     |          |      |               |           |
|                                            |                   | Short Rich Pulse (SRP) from 300C to 600C                           | 373     |                       |        |          |      |               |           |
| Ind. Eng. Chem. Res. 2019, 58, 12561-12570 | 2%Pd/Al2O3        | -                                                                  | 309     |                       |        |          |      |               |           |
|                                            |                   | Pre-reduction with H2 at 400C for 30min                            | 289     |                       | 0      |          |      |               |           |
|                                            |                   | Pre-reduction with CH4 at 400C for 30min                           | 289     |                       |        |          |      |               |           |
|                                            |                   | -                                                                  | 421     |                       |        |          |      |               |           |
|                                            |                   | Pre-reduction with H2 at 400C for 30min                            | 399     | 10                    | 12     |          |      |               |           |
|                                            |                   | Pre-reduction with CH4 at 400C for 30min                           | 399     |                       |        | -        | 80k  | 300           | -         |
|                                            | 2%Pd/CeO2         | -                                                                  | 353     |                       | 0      |          |      |               |           |
|                                            |                   | Pre-reduction with H2 at 400C for 30min                            | 303     |                       |        |          |      |               |           |
|                                            |                   | -                                                                  | 409     |                       | 12     |          |      |               |           |
|                                            |                   | Pre-reduction with H2 at 400C for 30min                            | 381     |                       |        |          |      |               |           |
|                                            |                   |                                                                    |         |                       |        |          |      |               |           |
|                                            |                   |                                                                    |         |                       |        |          |      |               |           |
| Energy Technology, 2014, 2, 243-249        | 1.2%Pd/Al2O3      | -                                                                  | 270     | 20                    | 0      | -        | 33k  | 250           | -         |
|                                            | 1.2%Pd/Al2O3      | Pre-reduction with H2 at 300C for 2 hrs                            | 280     |                       |        |          |      |               |           |

CH<sub>4</sub>-T50 of Pd catalyst reported in previous literature which was pretreated by various conditions, as far as we have been able to know, was summarized in Table S4. There was the result of Pd/CeO<sub>2</sub>, although Pd content, pretreatment conditions, and evaluation conditions were different from our study. CH<sub>4</sub>-T50 in the published paper was 303 °C (dry) / 381 °C (wet w 12 % H<sub>2</sub>O). Our results showed 310 °C (dry) / 367 °C (wet w 2% H<sub>2</sub>O) as CH<sub>4</sub>-T50 and were not significantly different from results in the previous study.

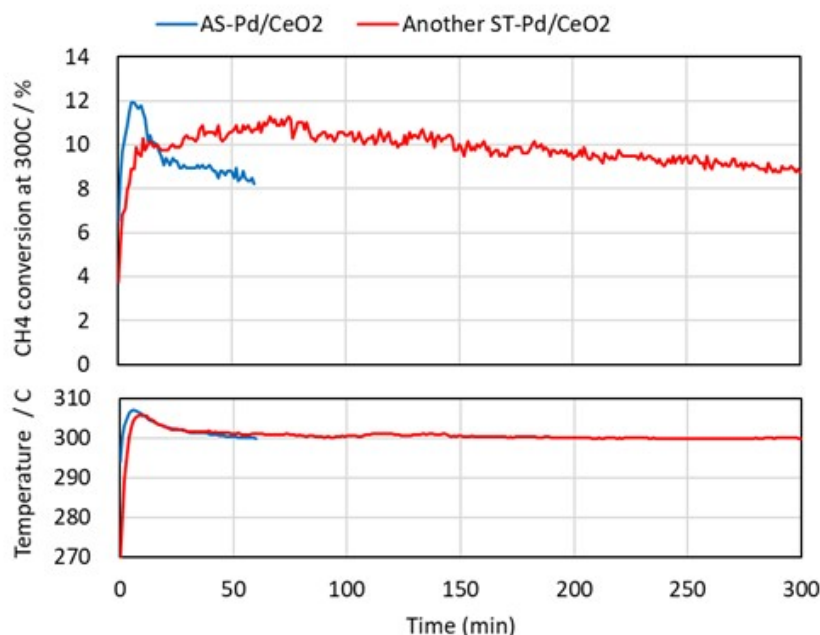

Figure S11. CH<sub>4</sub> combustion test under steady state condition at 300°C. Blue: AS-Pd/CeO<sub>2</sub>, Red: Another ST-Pd/CeO<sub>2</sub>.

CH<sub>4</sub> combustion test under steady-state conditions was carried out to demonstrate the catalyst life and/or catalyst durability of atmosphere-treated Pd/CeO<sub>2</sub>.

The hand-made experimental set-up was used for another atmosphere treatment and it was also used for the catalytic activity test with combination use of FTIR for the quantification of the outlet gas. FTIR was IR Prestige-21 made by SHIMAZU.

The conditions of this other atmosphere treatment were almost the same as the treatment of LT-Pd/CeO<sub>2</sub>, but different in the sample amount, and the duration time of the treatment. An aliquot of 50 mg of AS-Pd/CeO<sub>2</sub> was placed in the sample holder. The duration time was 10 minutes at 230 °C in this other atmosphere treatment because this was for the demonstration. Hereafter the sample is called Other ST-Pd/CeO<sub>2</sub>. After the treatment, the inlet gas composition was changed to 0.9% CH<sub>4</sub>, 9% O<sub>2</sub>, and Ar balanced at 111 mL/min for the catalytic evaluation and waited for another 10 minutes at 230 °C to reach a steady state. Then, the sample was heated up to 300 °C at 10 °C/min and kept for 5 hours for the catalytic stability test.

CH<sub>4</sub> conversion of Other ST-Pd/CeO<sub>2</sub> showed higher than AS-Pd/CeO<sub>2</sub> without any prior atmosphere treatment so that the Pd/PdO ratio could be optimized by the thermal decomposition of PdC which was formed during the atmosphere treatment for only 10 minutes. But the CH<sub>4</sub> conversion gradually decreased from about 11 % to 9 % during the steady-state reaction. It was reasonable because Pd metal could be oxidized to PdO and Pd/PdO ratio could be gradually out of the optimum range.
